# Supplementary material for: Carbon-incorporated bimetallic phosphide nanospheres derived from MOFs as superior electrocatalysts for hydrogen evolution
Source: Royal Society of Chemistry journal article supplement (doi:10.1039/d2dt02204d), 2022-01-01
Supplement: d2dt02204d1.pdf [file d2dt02204d1.pdf]

## Supporting Information

# Carbon-incorporated bimetallic phosphides nanospheres derived from MOFs as superior electrocatalysts for hydrogen evolution

Xiaoxuan Shao,<sup>a</sup> Shusheng Xu,<sup>\*a</sup> Peijie Wang,<sup>a</sup> Yi Wen,<sup>a</sup> Xuecheng Sun,<sup>\*b</sup> Min Hong,<sup>c</sup> Kaiwei Wu<sup>a</sup> and Xue-Rong Shi<sup>\*a</sup>

<sup>a</sup> School of Materials Engineering, Shanghai University of Engineering Science, Shanghai, 201620, P.R. China. E-mail: xushusheng@sues.edu.cn, E-mail: shixuer05@mails.uacs.ac.cn.

<sup>b</sup> Microelectronic Research & Development Center, School of Mechatronics Engineering and Automation, Shanghai University, Shanghai, 200444, P. R. China. E-mail: sunxc@shu.edu.cn

<sup>c</sup> Frontiers Science Center for Transformative Molecules, School of Chemistry and Chemical Engineering, Shanghai Jiao Tong University, Shanghai 200240, China

## Chemicals and Reagents

The chemicals we used in the experiment are of analytical grade (AR) and were directly used without any further purification. Polyvinylpyrrolidone (PVP), N, N-Dimethylformamide (DMF), Cobalt(II) acetylacetonate ( $\text{Co}(\text{acac})_2$ ), Iron(III) acetylacetonate ( $\text{Fe}(\text{acac})_3$ ) and ethanol were all purchased from Shanghai Titan Scientific Co., Ltd. Sodium hypophosphite monohydrate ( $\text{NaH}_2\text{PO}_2 \cdot \text{H}_2\text{O}$ ) and 1,3,5-benzenetricarboxylic acid ( $\text{H}_3\text{BTC}$ ) were obtained from Shanghai Aladdin Biochemical Technology. Ethylene glycol (EG) was obtained from Sinopharm Chemical Reagent Co., Ltd.

## Optimized H adsorption configuration.

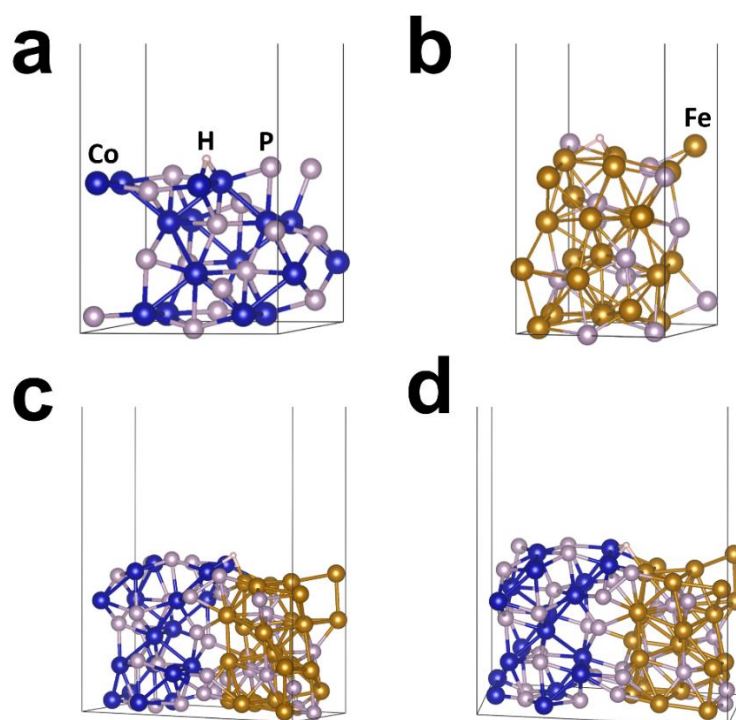

**Fig. S1.** Side views of the most favorable H adsorption configurations on (a) CoP(211), (b) Fe<sub>2</sub>P(111), and (c, d) CoP(211)-Fe<sub>2</sub>P(111): The black lines are the boundary lines of the unit-cell. 15 Å vacuum layer was added along z direction.

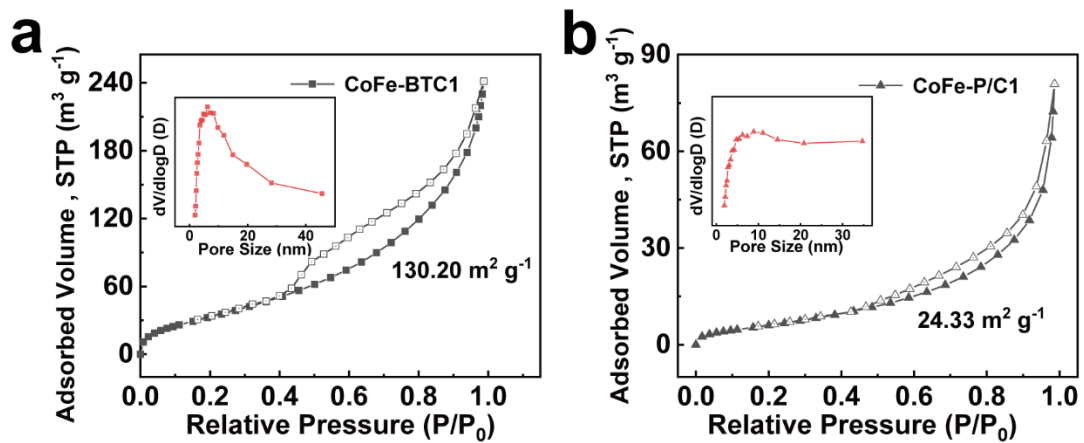

Fig. S2. The adsorption-desorption isotherms and pore size distribution profiles of (a) CoFe-BTC1 and (b) CoFe-P/C1.

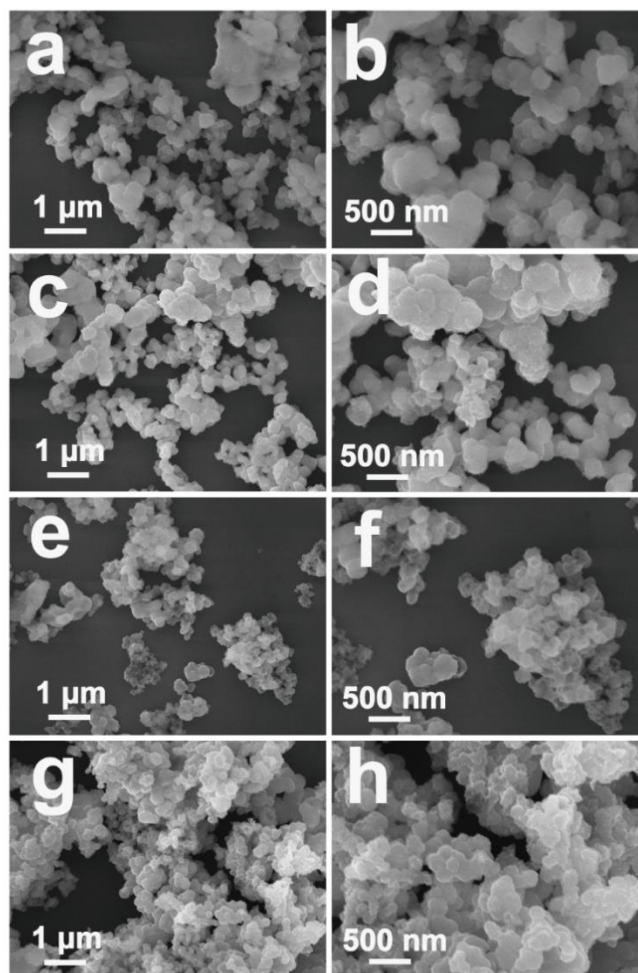

Fig. S3. The SEM images of (a, b) CoFe-BTC2, (c, d) CoFe-P/C2, (e, f) CoFe-BTC3, and (g, h) CoFe-P/C3.

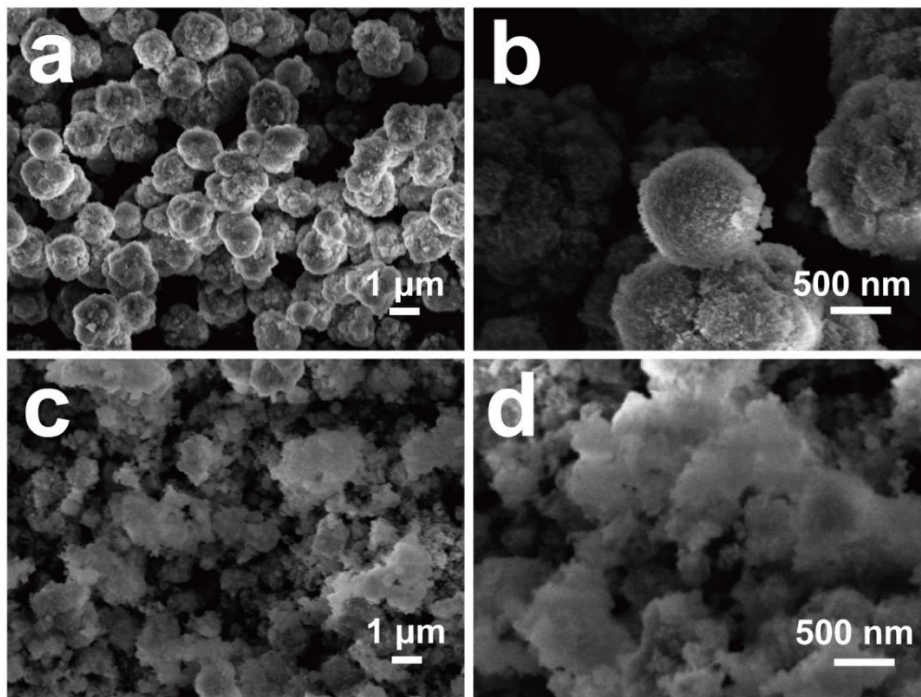

Fig. S4. SEM images of (a, b) CoP/C and (c, d) FeP/C.

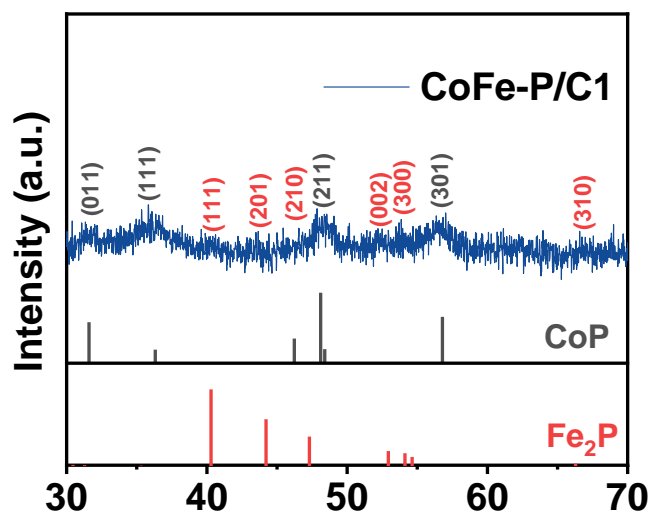

Fig. S5. The XRD spectra of CoFe-P/C1 at 30-70°

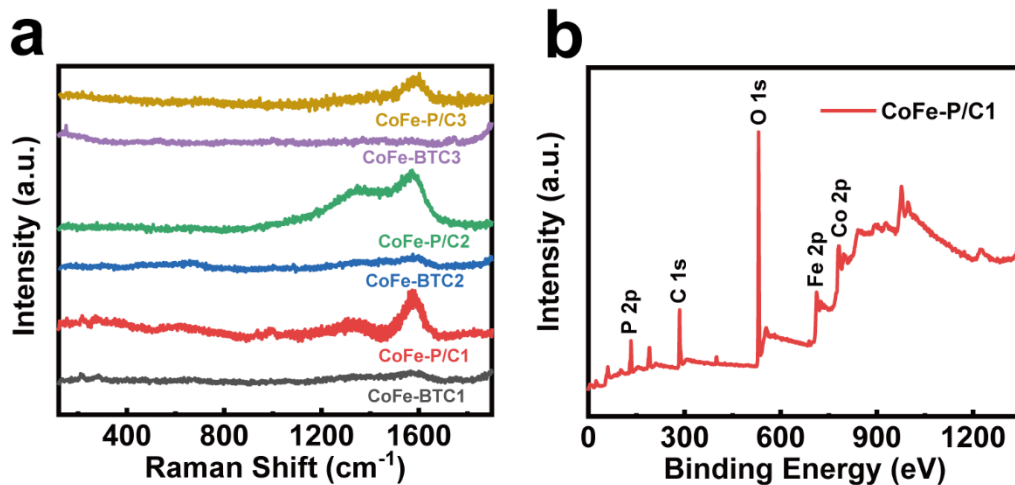

Fig. S6. (a) The Raman patterns of CoFe-BTC1, CoFe-P/C1, CoFe-BTC2, CoFe-P/C2, CoFe-BTC3, and CoFe-P/C3, (b) the XPS survey spectra of CoFe-P/C1.

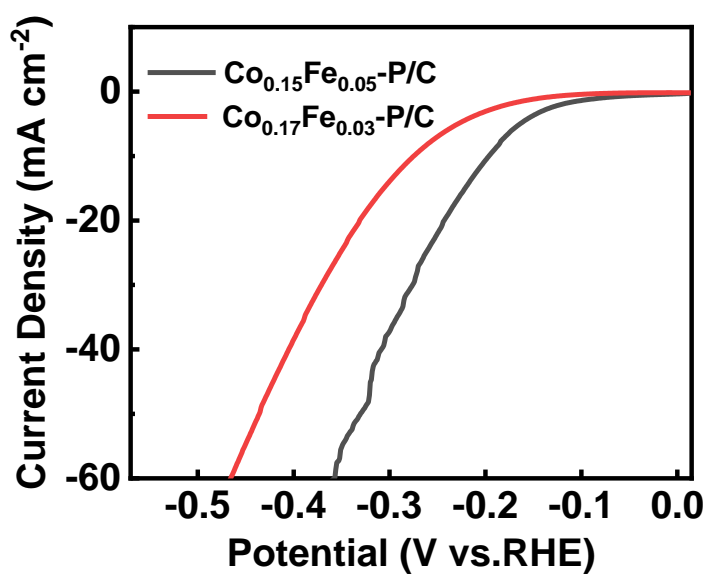

Fig. S7. LSV curves of the different Co:Fe ratios of 0.15:0.05 and 0.17:0.03.

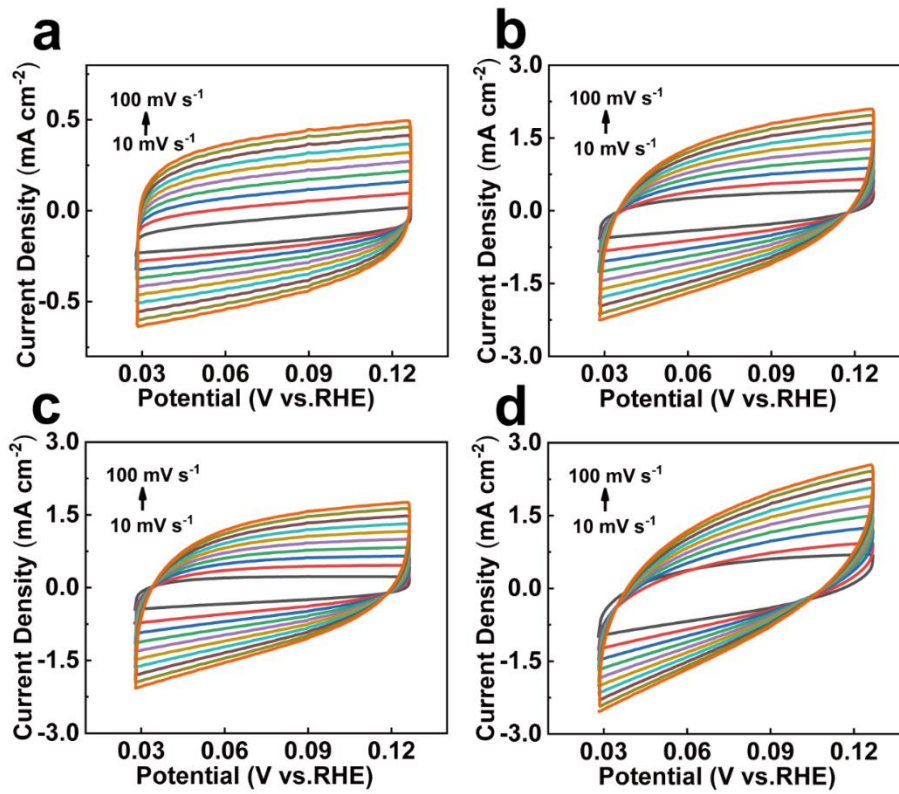

**Fig. S8.** The CV curves of (a) CoFe-BTC1, (b) CoFe-P/C1, (c) CoFe-P/C2, and (d) CoFe-P/C3 with various scan rates (10-100  $\text{mV s}^{-1}$ ) in the region of -1.0 to -0.9 V (vs. Ag/AgCl).

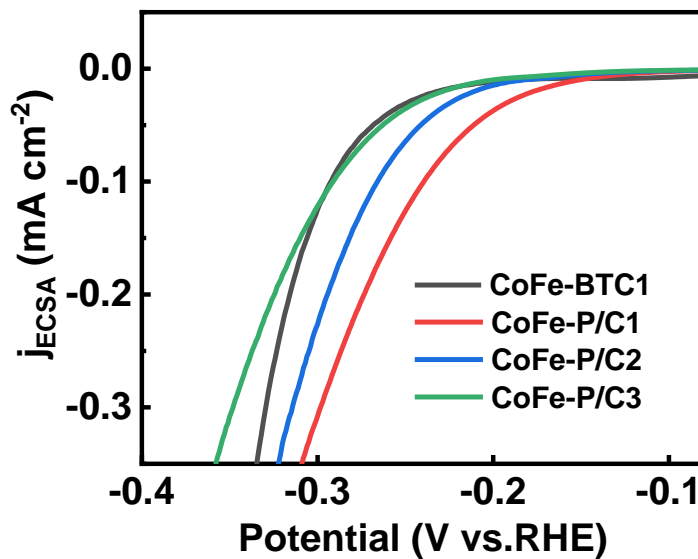

**Fig. S9.** ECSA-normalized LSV curves of CoFe-BTC1, CoFe-P/C1, CoFe-P/C2, and CoFe-P/C3 from Fig. 3a

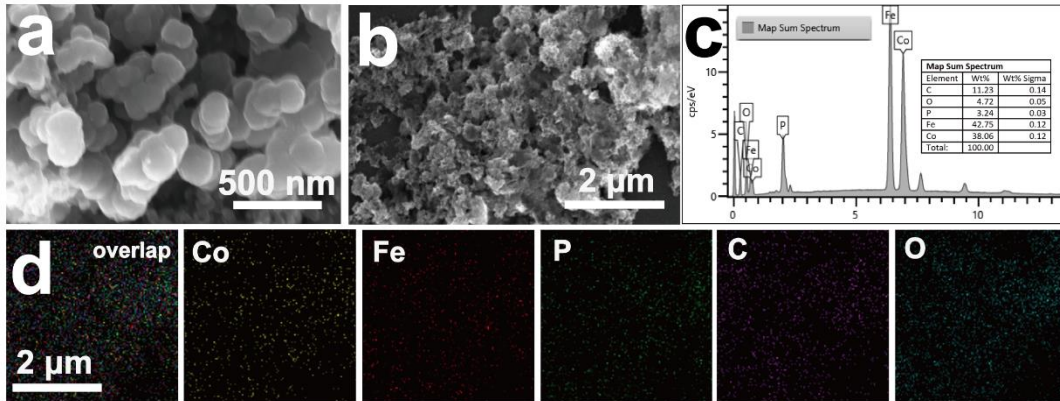

**Fig. S10.** (a, b) The SEM images, (c) EDS spectra, and (d) Elemental mapping images of CoFe-P/C1 after HER stability test in 1.0 M KOH solution for 12h.

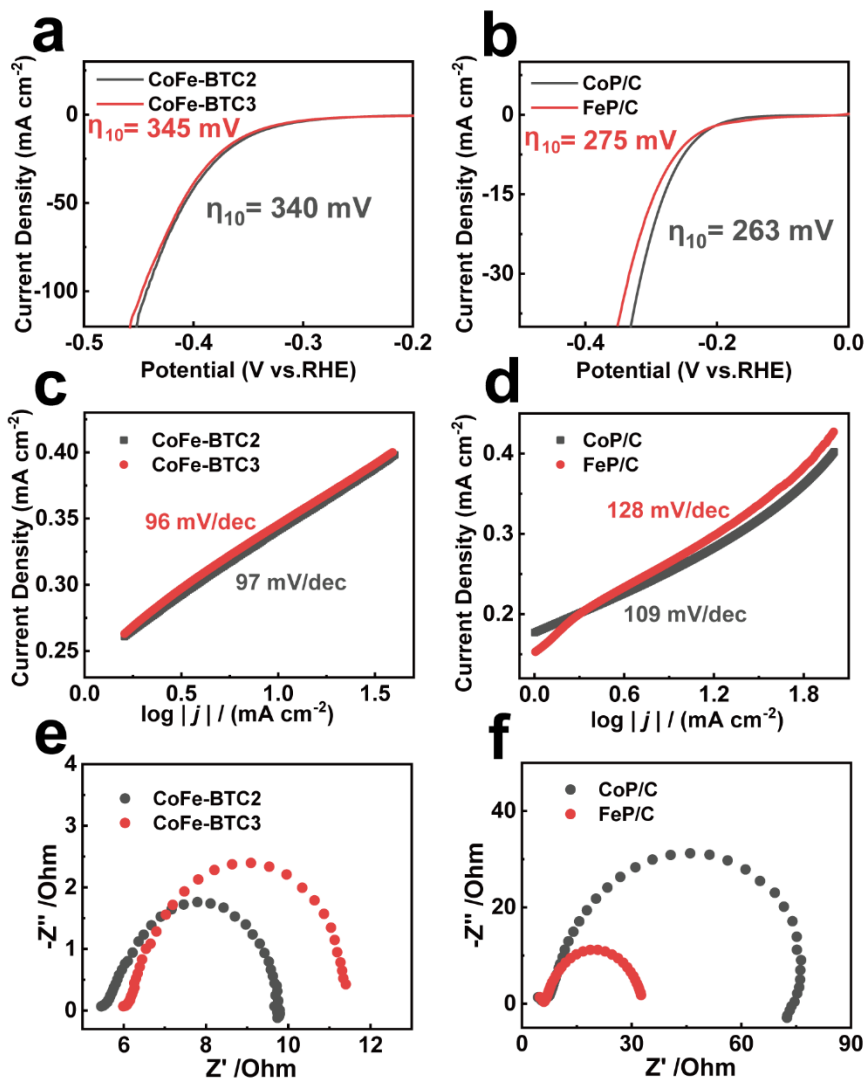

**Fig. S11.** The polarization curves of HER, Tafel slopes, and EIS curves in alkaline solution of (a, c, e) CoFe-BTC precursors with different Co/Fe ratios, and (b, d, f) the single metal phosphides (including CoP/C and FeP/C).

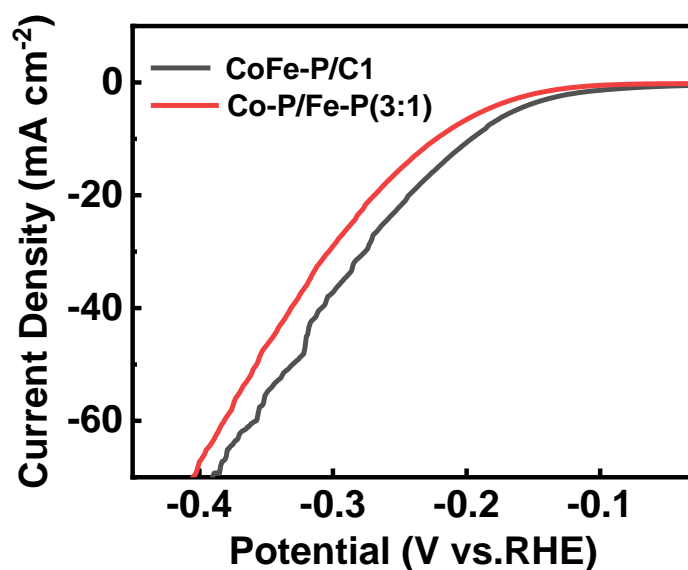

Fig. S12. LSV curves of CoFe-P/C1 and the physically mixed sample Co-P/Fe-P (3:1)

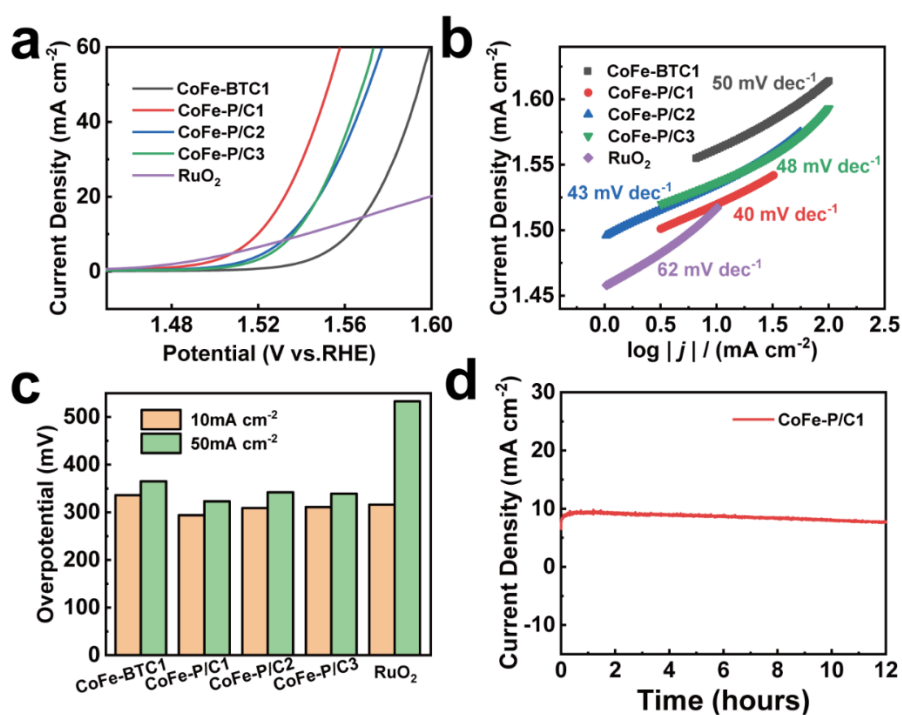

Fig. S13. (a) The polarization curves of OER, (b) the Tafel slopes corresponded, and (c) the listed overpotential data at 10 mA cm<sup>-2</sup> of RuO<sub>2</sub>, CoFe-P/C1, CoFe-P/C2, CoFe-P/C3, and CoFe-BTC1 in 1.0 M KOH. (d) The long-term stability test of CoFe-P/C1 at 0.494 V in alkaline solution.

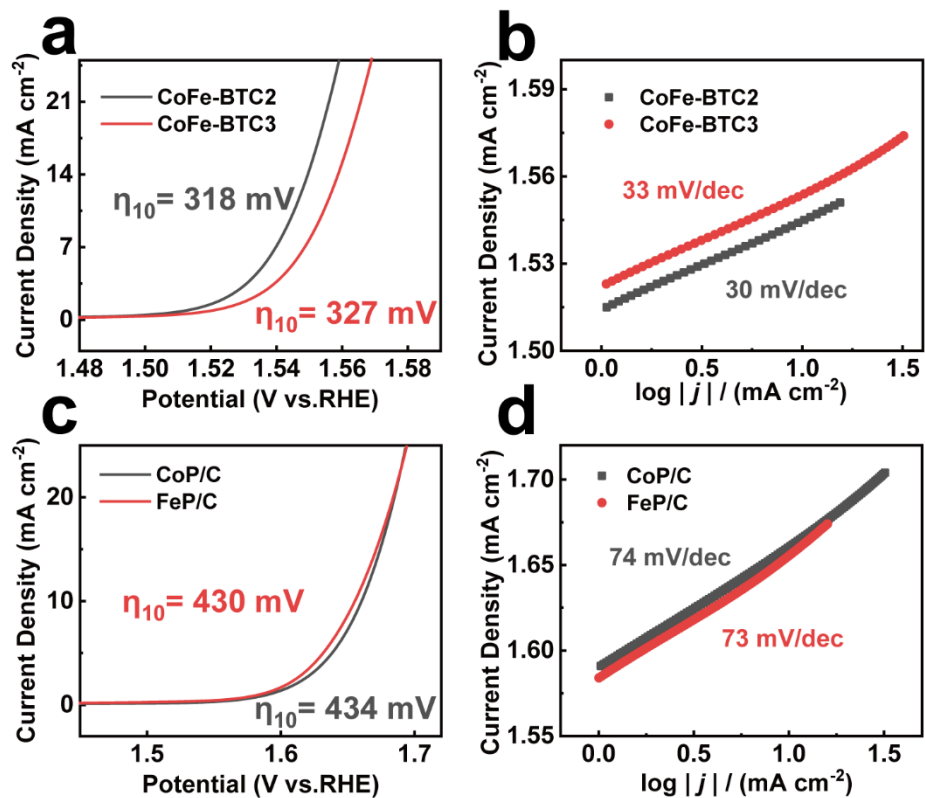

**Fig. S14.** The polarization curves of OER and Tafel slopes corresponded in alkaline solution of (a, b) CoFe-BTC precursors with different Co/Fe ratios and (c, d) the single metal phosphides (including CoP/C and FeP/C).



**Table S1.** Comparison of electrocatalytic performances of CoFe-P/C1 with other TMP-based electrocatalysts for HER in alkaline and acid solution.

| Catalysts        | Current Density (j) | Overpotential ( $\eta$ ) at (j) | Tafel Slope | Electrolyte                              | Ref.             |
|------------------|---------------------|---------------------------------|-------------|------------------------------------------|------------------|
| <b>CoFe-P/C1</b> | <b>10</b>           | <b>193</b>                      | <b>78</b>   | <b>1.0 M KOH</b>                         | <b>This work</b> |
| <b>CoFe-P/C1</b> | <b>10</b>           | <b>138</b>                      | <b>84</b>   | <b>0.5 M H<sub>2</sub>SO<sub>4</sub></b> | <b>This work</b> |
| NiCoP/rGO        | 10                  | 209                             | 124         | 1.0 M KOH                                | 1                |
| Ni-Fe/NF         | 10                  | 219                             | 110         | 1.0 M KOH                                | 2                |
| CoFeP@NSOC-300   | 10                  | 228                             | 90          | 1.0 M KOH                                | 3                |
| CoFeP@NSOC-500   | 10                  | 250                             | 115         | 1.0 M KOH                                | 3                |
| NiFeP/NF         | 10                  | 226.1                           | 107         | 1.0 M KOH                                | 4                |
| NiFeP            | 10                  | 243                             | 69          | 1.0 M KOH                                | 5                |
| CoP NRAs         | 10                  | 181                             | 69          | 0.5 M H <sub>2</sub> SO <sub>4</sub>     | 6                |
| Mn-CoP           | 10                  | 148                             | 61          | 0.5 M H <sub>2</sub> SO <sub>4</sub>     | 7                |

**Table S2.** Comparison of electrocatalytic performances of CoFe-P/C1 with other TMP-based electrocatalysts for OER in alkaline solution.

| Catalysts                              | Current Density (j) | Overpotential ( $\eta$ ) at (j) | Tafel Slope | Electrolyte      | Ref.             |
|----------------------------------------|---------------------|---------------------------------|-------------|------------------|------------------|
| <b>CoFe-P/C1</b>                       | <b>10</b>           | <b>293</b>                      | <b>40</b>   | <b>1.0 M KOH</b> | <b>This work</b> |
| CoNiP-1:1 NWs                          | 10                  | 301                             | 54          | 1.0 M KOH        | 8                |
| Ni <sub>1</sub> Co <sub>3</sub> -P@CSs | 10                  | 330                             | 113         | 1.0 M KOH        | 9                |
| NiCo <sub>2</sub> S <sub>4</sub> NWs   | 10                  | 336                             | 89          | 1.0 M KOH        | 10               |
| FeNiP/NPCS                             | 10                  | 318                             | 95          | 1.0 M KOH        | 11               |
| NiCoP                                  | 10                  | 336                             | 109         | 1.0 M KOH        | 12               |
| NiCoP/C                                | 10                  | 330                             | 96          | 1.0 M KOH        | 13               |
| Co-Ni-P film/Ti                        | 10                  | 340                             | 67          | 1.0 M KOH        | 14               |
| CoNiP/Ti                               | 10                  | 310                             | 52          | 1.0 M KOH        | 15               |

**Table S3.** Comparison of electrocatalytic performances of CoFe-P/C1 with other TMP-based electrocatalysts for overall water splitting in alkaline solution.

| Catalysts                 | Current Density (j) | Voltage (V) | Electrolyte      | Ref.             |
|---------------------------|---------------------|-------------|------------------|------------------|
| <b>CoFe-P/C1</b>          | <b>10</b>           | <b>1.62</b> | <b>1.0 M KOH</b> | <b>This work</b> |
| FeCo@FeCoP@C@NCCs         | 10                  | 1.64        | 1.0 M KOH        | 16               |
| amorphous NiFeCoP/Ni mesh | 10                  | 1.64        | 1.0 M KOH        | 9                |
| C-(Fe-Ni)P@PC/(Ni-Co)P@CC | 10                  | 1.63        | 1.0 M KOH        | 17               |
| NiCoP-NSAs/NF             | 10                  | 1.77        | 1.0 M KOH        | 18               |
| NiCoP                     | 10                  | 1.65        | 1.0 M KOH        | 14               |
| Co/NBC-900/GCE            | 10                  | 1.68        | 1.0 M KOH        | 19               |
| Co-Ni-P film/Ti           | 10                  | 1.71        | 1.0 M KOH        | 11               |

## References

- 1 J. Li, M. Yan, X. Zhou, Z. Q. Huang, Z. Xia, C. R. Chang, Y. Ma and Y. Qu, *Advanced Functional Materials*, 2016, **26**, 6785-6796.
- 2 X. Zhang, H. Xu, X. Li, Y. Li, T. Yang and Y. Liang, *ACS Catalysis*, 2016, **6**, 580-588.
- 3 Y. Zhang, L. Li, J. Chen, Y. Ma and X. Yang, *Ceramics International*, 2021, **47**, 12843-12850.
- 4 Y. Lin, M. Zhang, L. Zhao, L. Wang, D. Cao and Y. Gong, *Applied Surface Science*, 2021, **536**, 147952.
- 5 Y. Du, Z. Li, Y. Liu, Y. Yang and L. Wang, *Applied Surface Science*, 2018, **457**, 1081-1086.
- 6 L. Li, X. Li, L. Ai and J. Jiang, *RSC Advances*, 2015, **5**, 90265-90271.
- 7 Y. Li, B. Jia, B. Chen, Q. Liu, M. Cai, Z. Xue, Y. Fan, H. P. Wang, C. Y. Su and G. Li, *Dalton Transactions*, 2018, **47**, 14679-14685.
- 8 I. Amorim, J. Xu, N. Zhang, D. Xiong, S. M. Thalluri, R. Thomas, J. P. S. Sousa, A. Araújo, H. Li and L. Liu, *Catalysis Today*, 2020, **358**, 196-202.
- 9 V. H. Hoa, D. T. Tran, H. T. Le, N. H. Kim and J. H. Lee, *Applied Catalysis B: Environmental*, 2019, **253**, 235-245.
- 10 D. Liu, Q. Lu, Y. Luo, X. Sun and A. M. Asiri, *Nanoscale*, 2015, **7**, 15122-15126.
- 11 J. T. Ren, Y. S. Wang, L. Chen, L. J. Gao, W. W. Tian and Z. Y. Yuan, *Chemical Engineering Journal*, 2020, **389**, 124408.
- 12 R. Zhang, J. Huang, G. Chen, W. Chen, C. Song, C. Li and K. Ostrikov, *Applied Catalysis B: Environmental*, 2019, **254**, 414-423.
- 13 P. He, X. Y. Yu and X. W. D. Lou, *Angewandte Chemie - International Edition*, 2017, **56**, 3897-3900.
- 14 Y. Pei, Y. Yang, F. Zhang, P. Dong, R. Baines, Y. Ge, H. Chu, P. M. Ajayan, J. Shen and M. Ye, *ACS Applied Materials and Interfaces*, 2017, **9**, 31887-31896.
- 15 C. Wang, J. Jiang, T. Ding, G. Chen, W. Xu and Q. Yang, *Advanced Materials Interfaces*, **3**, 1500454.
- 16 Y. Li, S. Li, J. Hu, Y. Zhang, Y. Du, X. Han, X. Liu and P. Xu, *Journal of Energy Chemistry*, 2020, **53**, 1-8.
- 17 C. N. Lv, L. Zhang, X. H. Huang, Y. X. Zhu, X. Zhang, J. S. Hu and S. Y. Lu, *Nano Energy*, 2019, **65**, 103995.
- 18 Y. Li, H. Zhang, M. Jiang, Y. Kuang, X. Sun and X. Duan, *Nano Research*, 2016, **9**, 2251-2259.
- 19 M. R. Liu, Q. L. Hong, Q. H. Li, Y. Du, H. X. Zhang, S. Chen, T. Zhou and J. Zhang, *Advanced Functional Materials*, **28**, 1801136.
